# Supplementary material for: Reassessing the Link between Airborne Arsenic Exposure among Anaconda Copper Smelter Workers and Multiple Causes of Death Using the Parametric g-Formula
Source: PubMed Central journal article supplement (PMC5381993; doi:10.1289/ehp438), 2016-08-19
Supplement: EHP438.s001.acco.pdf [file EHP438.s001.acco.pdf]

**Note to readers with disabilities:** *EHP* strives to ensure that all journal content is accessible to all readers. However, some figures and Supplemental Material published in *EHP* articles may not conform to [508 standards](#) due to the complexity of the information being presented. If you need assistance accessing journal content, please contact [ehp508@niehs.nih.gov](mailto:ehp508@niehs.nih.gov). Our staff will work with you to assess and meet your accessibility needs within 3 working days.

## **Supplemental Material**

# **Reassessing the Link between Airborne Arsenic Exposure among Anaconda Copper Smelter Workers and Multiple Causes of Death Using the Parametric g-Formula**

Alexander P. Keil and David B. Richardson

### **Table of Contents**

**Table S1:** ICD-8 codes used for specific causes of death

**Table S2:** Model forms

**Table S3:** Variable names and definitions

**Table S1: ICD-8 codes used for specific causes of death**

---

| ICD-8 code | Description                                                                  |
|------------|------------------------------------------------------------------------------|
|            | Respiratory cancer                                                           |
| 160        | Malignant neoplasm of nose, nasal cavities, middle ear and accessory sinuses |
| 161        | Malignant neoplasm of larynx                                                 |
| 162        | Malignant neoplasm of trachea, bronchus and lung                             |
| 163        | Malignant neoplasm of other and unspecified respiratory organs               |
|            | Heart disease                                                                |
| 410-414    | <i>Ischemic Heart disease</i>                                                |
| 410        | Acute myocardial infarction                                                  |
| 411        | Other acute and subacute forms of ischaemic heart disease                    |
| 412        | Chronic ischaemic heart disease                                              |
| 413        | Angina pectoris                                                              |
| 414        | Asymptomatic ischaemic heart disease                                         |
| 420-429    | <i>Other forms of heart disease</i>                                          |
| 420        | Acute pericarditis, non-rheumatic                                            |
| 421        | Acute and subacute endocarditis                                              |
| 422        | Acute myocarditis                                                            |
| 423        | Chronic disease of pericardium, non-rheumatic                                |
| 424        | Chronic disease of endocardium                                               |
| 425        | Cardiomyopathy                                                               |
| 426        | Pulmonary heart disease                                                      |
| 427        | Symptomatic heart disease                                                    |
| 428        | Other myocardial insufficiency                                               |
| 429        | Ill-defined heart disease                                                    |

---

**Table S2: Model forms**

| <b>Regressand</b>                                      | <b>Model form</b>          | <b>Regressors<sup>a</sup></b>                                                                                                                                                                                                                                                                                                        |
|--------------------------------------------------------|----------------------------|--------------------------------------------------------------------------------------------------------------------------------------------------------------------------------------------------------------------------------------------------------------------------------------------------------------------------------------|
| Respiratory cancer mortality (binary)                  | Pooled logistic            | cum_as_2_5, cum_as_5_10, cum_as_10_20, agein_cen, agein_cen1, agein_cen2, agein_cen3, caltime, agein_cen*caltime, agein_cen1*caltime, agein_cen2*caltime, agein_cen3*caltime, caltime*caltime, cumtawbfu, cumtawbfu*cumtawbfu, usborn, cum_as_score_bfu, inactivelag1, activework, cumtawdfu_lag1, cumtawdfu_lag1*cumtawdfu_lag1     |
| Heart disease mortality (binary)                       | Pooled logistic            | cum_as_2_5, cum_as_5_10, cum_as_10_20, agein_cen, agein_cen1, agein_cen2, agein_cen3, caltime, agein_cen*caltime, agein_cen1*caltime, agein_cen2*caltime, agein_cen3*caltime, cumtawbfu, cumtawbfu*cumtawbfu, usborn, cum_as_score_bfu, inactivelag1, activework, cumtawdfu_lag1, cumtawdfu_lag1*cumtawdfu_lag1                      |
| All other causes of death (binary)                     | Pooled logistic            | cum_as_2_5, cum_as_5_10, cum_as_10_20, agein_cen, agein_cen1, agein_cen2, agein_cen3, caltime, agein_cen*caltime, agein_cen1*caltime, agein_cen2*caltime, agein_cen3*caltime, cumtawbfu, cumtawbfu*cumtawbfu, usborn, cum_as_score_bfu, inactivelag1, activework, cumtawdfu_lag1, cumtawdfu_lag1*cumtawdfu_lag1                      |
| Leaving work, pre-1977 (binary)                        | Pooled logistic            | cum_as_2_5, cum_as_5_10, cum_as_10_20, agein_cen_aw*over65, agein_cen_aw*(1-over65), cumtawbfu, cumtawbfu*cumtawbfu, usborn, cum_as_score_bfu, cumtawdfu_lag1, cumtawdfu, cumtawdfu_lag1*cumtawdfu_lag1                                                                                                                              |
| Returning to work, pre-1977 (binary)                   | Pooled logistic            | cum_as_1_5, cum_as_5_10, cum_as_10_20, agein_cen_ow, agein_cen_ow1, agein_cen_ow2, agein_cen_ow3, caltime_ow, agein_cen_ow*caltime_ow, agein_cen_ow1*caltime_ow, agein_cen_ow2*caltime_ow, agein_cen_ow3*caltime_ow, cumtawbfu, cumtawbfu*cumtawbfu, usborn, cum_as_score_bfu, over65, cumtawdfu_lag1, cumtawdfu_lag1*cumtawdfu_lag1 |
| Arsenic exposure at work (Low, medium, heavy exposure) | Pooled cumulative logistic | cum_as_1_5, cum_as_5_10, cum_as_10_20, agein_cen, agein_cen1, agein_cen2, agein_cen3, caltime, agein_cen*caltime, agein_cen1*caltime, agein_cen2*caltime, agein_cen3*caltime, cumtawbfu, cumtawbfu*cumtawbfu, usborn, cum_as_score_bfu, cumtawdfu_lag1, cumtawdfu_lag1*cumtawdfu_lag1                                                |

<sup>a</sup> Variable names defined in Table S3.

**Table S3: Variable names and definitions**

| Variable name    | Description                                                                                                                                    |
|------------------|------------------------------------------------------------------------------------------------------------------------------------------------|
| activework       | Currently at work during person period                                                                                                         |
| agein_cen        | Age at start of person-period, centered                                                                                                        |
| agein_cen1       | Restricted cubic spline variable 1, age at start of person period                                                                              |
| agein_cen1_aw    | Restricted cubic spline variable 1, age at start of person period, knots defined using percentiles of person time of actively employed workers |
| agein_cen1_ow    | Restricted cubic spline variable 1, age at start of person period, knots defined using percentiles of person time of inactive workers          |
| agein_cen2       | Restricted cubic spline variable 2, age at start of person period                                                                              |
| agein_cen2_aw    | Restricted cubic spline variable 2, age at start of person period, knots defined using percentiles of person time of actively employed workers |
| agein_cen2_ow    | Restricted cubic spline variable 2, age at start of person period, knots defined using percentiles of person time of inactive workers          |
| agein_cen3       | Restricted cubic spline variable 3, age at start of person period                                                                              |
| agein_cen3_aw    | Restricted cubic spline variable 3, age at start of person period, knots defined using percentiles of person time of actively employed workers |
| agein_cen3_ow    | Restricted cubic spline variable 3, age at start of person period, knots defined using percentiles of person time of inactive workers          |
| caltime          | Calendar time at start of person period (centered at 1/1/1950, per 20 years)                                                                   |
| cum_as_1_5       | Total arsenic exposure from 1-5 years prior to start of person period                                                                          |
| cum_as_10_20     | Total arsenic exposure from 10-20 years prior to start of person period (quantitative score)                                                   |
| cum_as_2_5       | Total arsenic exposure from 2-5 years prior to start of person period (quantitative score)                                                     |
| cum_as_5_10      | Total arsenic exposure from 5-10 years prior to start of person period (quantitative score)                                                    |
| cum_as_score_bfu | Total arsenic exposure from before follow-up (quantitative score)                                                                              |
| cumtawbfu        | Cumulative time at work before follow-up (years)                                                                                               |
| cumtawdfu        | Cumulative time at work during follow-up (years)                                                                                               |
| cumtawdfu_lag1   | Cumulative time at work during follow-up (lag 1 year)                                                                                          |
| inactivelag1     | Off work for more than one year (lag 1 year, 1=yes, 0=no)                                                                                      |
| over65           | Age 65 or over (1:age>65, 0:age<=65)                                                                                                           |
| usborn           | Born in the United states (1=yes, 0=no)                                                                                                        |
